# Supplementary material for: Accuracy of the diffusion quantum Monte Carlo method on dissociation curves of van der Waals systems with the single-Slater–Jastrow trial wavefunction
Source: Royal Society of Chemistry journal article supplement (doi:10.1039/d4cp04261a), 2025-01-01
Supplement: d4cp04261a1.pdf [file d4cp04261a1.pdf]

Supplementary Information: Accuracy of Diffusion Quantum Monte  
Carlo Method on Dissociation Curves of van der Waals Systems  
with Single-Slater-Jastrow Trial Wavefunction

Zhiru Huang,<sup>a</sup> Xiaojun Zhou,<sup>b</sup> Fan Wang<sup>\*a</sup>

<sup>a</sup> Institute of Atomic and Molecular Physics, Key Laboratory of High Energy Density Physics and  
Technology, Ministry of Education, Sichuan University, Chengdu 610065, People's Republic of China

<sup>b</sup> School of Physics & Information Science, Shaanxi University of Science and Technology, Xi'an  
710021, People's Republic of China

\* Corresponding author: wangf44@gmail.com

## **Table of Contents**

S1. Details for geometries of ten molecules at different inter-molecule distance.

S2-S3. Total energies of ten molecules at different inter-molecule distance by CCSD(T)-PPs

S4-S5. Total energies of ten molecules at different inter-molecule distance by CCSD-PPs

S6-S7. Total energies of ten molecules at different inter-molecule distance by MP2-PPs

S8. Total energies and error bars of ten molecules at different inter-molecule distance by DMC with T-moves

S9. Total energies and error bars of ten molecules at different inter-molecule distance by DMC with DLA

## S1 Geometries of ten molecules at different inter-molecule distance(unit: Å)

CH<sub>4</sub>-F<sub>2</sub> 0.7

|   |              |              |              |
|---|--------------|--------------|--------------|
| C | -0.099779142 | -0.049213106 | -0.049809806 |
| H | -0.812383509 | 0.769437899  | -0.053814782 |
| H | -0.386626161 | -0.773928179 | 0.705768112  |
| H | 0.890551861  | 0.333663823  | 0.175221084  |
| H | -0.089826477 | -0.524172039 | -1.025860985 |
| F | -0.827719852 | -2.35344679  | -0.471050203 |
| F | -1.244272067 | -3.668132309 | -0.7047231   |

CH<sub>4</sub>-F<sub>2</sub> 0.8

|   |              |              |              |
|---|--------------|--------------|--------------|
| C | -0.099779142 | -0.049213106 | -0.049809806 |
| H | -0.812383509 | 0.769437899  | -0.053814782 |
| H | -0.386626161 | -0.773928179 | 0.705768112  |
| H | 0.890551861  | 0.333663823  | 0.175221084  |
| H | -0.089826477 | -0.524172039 | -1.025860985 |
| F | -0.919288765 | -2.643106031 | -0.523678545 |
| F | -1.335840980 | -3.957791550 | -0.757351442 |

CH<sub>4</sub>-F<sub>2</sub> 0.9

|   |              |              |              |
|---|--------------|--------------|--------------|
| C | -0.099779142 | -0.049213106 | -0.049809806 |
| H | -0.812383509 | 0.769437899  | -0.053814782 |
| H | -0.386626161 | -0.773928179 | 0.705768112  |
| H | 0.890551861  | 0.333663823  | 0.175221084  |
| H | -0.089826477 | -0.524172039 | -1.025860985 |
| F | -1.010857678 | -2.932765272 | -0.576306887 |
| F | -1.427409893 | -4.247450791 | -0.809979784 |

CH<sub>4</sub>-F<sub>2</sub> 1.0

|   |              |              |              |
|---|--------------|--------------|--------------|
| C | -0.099779142 | -0.049213106 | -0.049809806 |
| H | -0.812383509 | 0.769437899  | -0.053814782 |
| H | -0.386626161 | -0.773928179 | 0.705768112  |
| H | 0.890551861  | 0.333663823  | 0.175221084  |
| H | -0.089826477 | -0.524172039 | -1.025860985 |
| F | -1.101049679 | -3.218068940 | -0.628143863 |
| F | -1.517601894 | -4.532754459 | -0.861816760 |

CH<sub>4</sub>-F<sub>2</sub> 1.25

|   |              |              |              |
|---|--------------|--------------|--------------|
| C | -0.099779142 | -0.049213106 | -0.049809806 |
| H | -0.812383509 | 0.769437899  | -0.053814782 |
| H | -0.386626161 | -0.773928179 | 0.705768112  |
| H | 0.890551861  | 0.333663823  | 0.175221084  |
| H | -0.089826477 | -0.524172039 | -1.025860985 |

|                                     |              |              |              |
|-------------------------------------|--------------|--------------|--------------|
| F                                   | -1.323042144 | -3.920296008 | -0.755731874 |
| F                                   | -1.739594359 | -5.234981527 | -0.989404771 |
| CH <sub>4</sub> -F <sub>2</sub> 1.5 |              |              |              |
| C                                   | -0.099779142 | -0.049213106 | -0.049809806 |
| H                                   | -0.812383509 | 0.769437899  | -0.053814782 |
| H                                   | -0.386626161 | -0.773928179 | 0.705768112  |
| H                                   | 0.890551861  | 0.333663823  | 0.175221084  |
| H                                   | -0.089826477 | -0.524172039 | -1.025860985 |
| F                                   | -1.542048797 | -4.613078082 | -0.881603819 |
| F                                   | -1.958601012 | -5.927763601 | -1.115276716 |

|                                     |              |              |              |
|-------------------------------------|--------------|--------------|--------------|
| CH <sub>4</sub> -F <sub>2</sub> 2.0 |              |              |              |
| C                                   | -0.099779142 | -0.049213106 | -0.049809806 |
| H                                   | -0.812383509 | 0.769437899  | -0.053814782 |
| H                                   | -0.386626161 | -0.773928179 | 0.705768112  |
| H                                   | 0.890551861  | 0.333663823  | 0.175221084  |
| H                                   | -0.089826477 | -0.524172039 | -1.025860985 |
| F                                   | -1.975788712 | -5.985124242 | -1.130891618 |
| F                                   | -2.392340927 | -7.299809761 | -1.364564515 |

|                                      |              |              |              |
|--------------------------------------|--------------|--------------|--------------|
| CH <sub>4</sub> -Cl <sub>2</sub> 0.7 |              |              |              |
| C                                    | -0.029223000 | -0.304334000 | -0.044139000 |
| Cl                                   | -1.583930727 | -1.982155399 | -0.718694605 |
| Cl                                   | -2.886359727 | -3.388877399 | -1.283237605 |
| H                                    | -1.013963000 | 0.140625000  | -0.150390000 |
| H                                    | -0.061190000 | -1.086463000 | 0.708351000  |
| H                                    | 0.678304000  | 0.459656000  | 0.262535000  |
| H                                    | 0.286077000  | -0.724543000 | -0.994403000 |

|                                      |              |              |              |
|--------------------------------------|--------------|--------------|--------------|
| CH <sub>4</sub> -Cl <sub>2</sub> 0.8 |              |              |              |
| C                                    | -0.029223000 | -0.304334000 | -0.044139000 |
| Cl                                   | -1.811091049 | -2.227363603 | -0.817226217 |
| Cl                                   | -3.113520049 | -3.634085603 | -1.381769217 |
| H                                    | -1.013963000 | 0.140625000  | -0.150390000 |
| H                                    | -0.061190000 | -1.086463000 | 0.708351000  |
| H                                    | 0.678304000  | 0.459656000  | 0.262535000  |
| H                                    | 0.286077000  | -0.724543000 | -0.994403000 |

|                                      |              |              |              |
|--------------------------------------|--------------|--------------|--------------|
| CH <sub>4</sub> -Cl <sub>2</sub> 0.9 |              |              |              |
| C                                    | -0.029223000 | -0.304334000 | -0.044139000 |
| Cl                                   | -2.038251371 | -2.472571807 | -0.915757829 |
| Cl                                   | -3.340680371 | -3.879293807 | -1.480300829 |
| H                                    | -1.013963000 | 0.140625000  | -0.150390000 |
| H                                    | -0.061190000 | -1.086463000 | 0.708351000  |

|                                      |             |              |              |
|--------------------------------------|-------------|--------------|--------------|
| H                                    | 0.678304000 | 0.459656000  | 0.262535000  |
| H                                    | 0.286077000 | -0.724543000 | -0.994403000 |
| CH <sub>4</sub> -Cl <sub>2</sub> 1.0 |             |              |              |
| C                                    | -0.029223   | -0.304334    | -0.044139    |
| Cl                                   | -2.261745   | -2.713822    | -1.012699    |
| Cl                                   | -3.564174   | -4.120544    | -1.577242    |
| H                                    | -1.013963   | 0.140625     | -0.150390    |
| H                                    | -0.061190   | -1.086463    | 0.708351     |
| H                                    | 0.678304    | 0.459656     | 0.262535     |
| H                                    | 0.286077    | -0.724543    | -0.994403    |

|                                       |              |              |              |
|---------------------------------------|--------------|--------------|--------------|
| CH <sub>4</sub> -Cl <sub>2</sub> 1.25 |              |              |              |
| C                                     | -0.029223000 | -0.304334000 | -0.044139000 |
| Cl                                    | -2.811142218 | -3.306868814 | -1.251002033 |
| Cl                                    | -4.113571218 | -4.713590814 | -1.815545033 |
| H                                     | -1.013963000 | 0.140625000  | -0.150390000 |
| H                                     | -0.061190000 | -1.086463000 | 0.708351000  |
| H                                     | 0.678304000  | 0.459656000  | 0.262535000  |
| H                                     | 0.286077000  | -0.724543000 | -0.994403000 |

|                                      |              |              |              |
|--------------------------------------|--------------|--------------|--------------|
| CH <sub>4</sub> -Cl <sub>2</sub> 1.5 |              |              |              |
| C                                    | -0.029223000 | -0.304334000 | -0.044139000 |
| Cl                                   | -3.352625156 | -3.891372559 | -1.485872218 |
| Cl                                   | -4.655054156 | -5.298094559 | -2.050415218 |
| H                                    | -1.013963000 | 0.140625000  | -0.150390000 |
| H                                    | -0.061190000 | -1.086463000 | 0.708351000  |
| H                                    | 0.678304000  | 0.459656000  | 0.262535000  |
| H                                    | 0.286077000  | -0.724543000 | -0.994403000 |

|                                      |              |              |              |
|--------------------------------------|--------------|--------------|--------------|
| CH <sub>4</sub> -Cl <sub>2</sub> 2.0 |              |              |              |
| C                                    | -0.029223000 | -0.304334000 | -0.044139000 |
| Cl                                   | -4.424274683 | -5.048164617 | -1.950704081 |
| Cl                                   | -5.726703683 | -6.454886617 | -2.515247081 |
| H                                    | -1.013963000 | 0.140625000  | -0.150390000 |
| H                                    | -0.061190000 | -1.086463000 | 0.708351000  |
| H                                    | 0.678304000  | 0.459656000  | 0.262535000  |
| H                                    | 0.286077000  | -0.724543000 | -0.994403000 |

|                                      |              |              |              |
|--------------------------------------|--------------|--------------|--------------|
| CH <sub>4</sub> -Br <sub>2</sub> 0.7 |              |              |              |
| C                                    | 0.050957671  | 0.055164191  | -0.032925885 |
| H                                    | -1.024445640 | 0.072269161  | 0.117546172  |
| H                                    | 0.508348983  | -0.636912672 | 0.667869998  |
| H                                    | 0.450713107  | 1.050360674  | 0.135265329  |

|                                      |              |              |              |
|--------------------------------------|--------------|--------------|--------------|
| H                                    | 0.274236028  | -0.252091989 | -1.050343280 |
| Br                                   | -0.862479139 | -2.145532273 | -0.429940909 |
| Br                                   | -1.723149959 | -4.229681976 | -0.80259836  |
| CH <sub>4</sub> -Br <sub>2</sub> 0.8 |              |              |              |
| C                                    | 0.050957671  | 0.055164191  | -0.032925885 |
| H                                    | -1.024445640 | 0.072269161  | 0.117546172  |
| H                                    | 0.508348983  | -0.636912672 | 0.667869998  |
| H                                    | 0.450713107  | 1.050360674  | 0.135265329  |
| H                                    | 0.274236028  | -0.252091989 | -1.050343280 |
| Br                                   | -0.994989432 | -2.465309424 | -0.487463977 |
| Br                                   | -1.855660252 | -4.549459127 | -0.860121428 |

|                                      |              |              |              |
|--------------------------------------|--------------|--------------|--------------|
| CH <sub>4</sub> -Br <sub>2</sub> 0.9 |              |              |              |
| C                                    | 0.050957671  | 0.055164191  | -0.032925885 |
| H                                    | -1.024445640 | 0.072269161  | 0.117546172  |
| H                                    | 0.508348983  | -0.636912672 | 0.667869998  |
| H                                    | 0.450713107  | 1.050360674  | 0.135265329  |
| H                                    | 0.274236028  | -0.252091989 | -1.050343280 |
| Br                                   | -1.127499725 | -2.785086575 | -0.544987045 |
| Br                                   | -1.988170545 | -4.869236278 | -0.917644496 |

|                                      |              |              |              |
|--------------------------------------|--------------|--------------|--------------|
| CH <sub>4</sub> -Br <sub>2</sub> 1.0 |              |              |              |
| C                                    | 0.050957671  | 0.055164191  | -0.032925885 |
| H                                    | -1.024445640 | 0.072269161  | 0.117546172  |
| H                                    | 0.508348983  | -0.636912672 | 0.667869998  |
| H                                    | 0.450713107  | 1.050360674  | 0.135265329  |
| H                                    | 0.274236028  | -0.252091989 | -1.050343280 |
| Br                                   | -1.257927165 | -3.099837332 | -0.601605941 |
| Br                                   | -2.118597985 | -5.183987035 | -0.974263392 |

|                                       |              |              |              |
|---------------------------------------|--------------|--------------|--------------|
| CH <sub>4</sub> -Br <sub>2</sub> 1.25 |              |              |              |
| C                                     | 0.050957671  | 0.055164191  | -0.032925885 |
| H                                     | -1.024445640 | 0.072269161  | 0.117546172  |
| H                                     | 0.508348983  | -0.636912672 | 0.667869998  |
| H                                     | 0.450713107  | 1.050360674  | 0.135265329  |
| H                                     | 0.274236028  | -0.252091989 | -1.050343280 |
| Br                                    | -1.578688966 | -3.873907725 | -0.740849485 |
| Br                                    | -2.439359786 | -5.958057428 | -1.113506936 |

|                                      |              |              |              |
|--------------------------------------|--------------|--------------|--------------|
| CH <sub>4</sub> -Br <sub>2</sub> 1.5 |              |              |              |
| C                                    | 0.050957671  | 0.055164191  | -0.032925885 |
| H                                    | -1.024445640 | 0.072269161  | 0.117546172  |
| H                                    | 0.508348983  | -0.636912672 | 0.667869998  |
| H                                    | 0.450713107  | 1.050360674  | 0.135265329  |

|                                      |              |              |              |
|--------------------------------------|--------------|--------------|--------------|
| H                                    | 0.274236028  | -0.252091989 | -1.050343280 |
| Br                                   | -1.894944789 | -4.637104180 | -0.878136972 |
| Br                                   | -2.755615609 | -6.721253883 | -1.250794423 |
| CH <sub>4</sub> -Br <sub>2</sub> 2.0 |              |              |              |
| C                                    | 0.050957671  | 0.055164191  | -0.032925885 |
| H                                    | -1.024445640 | 0.072269161  | 0.117546172  |
| H                                    | 0.508348983  | -0.636912672 | 0.667869998  |
| H                                    | 0.450713107  | 1.050360674  | 0.135265329  |
| H                                    | 0.274236028  | -0.252091989 | -1.050343280 |
| Br                                   | -2.521008076 | -6.147935751 | -1.149912697 |
| Br                                   | -3.381678896 | -8.232085454 | -1.522570148 |

CH<sub>4</sub>-I<sub>2</sub> 0.7

|   |              |              |              |
|---|--------------|--------------|--------------|
| C | -0.032603000 | -0.245329000 | -0.035933000 |
| I | -1.735932251 | -1.952081899 | -0.874064591 |
| I | -3.510811251 | -3.729086899 | -1.746886591 |
| H | -0.980553000 | 0.254481000  | -0.212468000 |
| H | -0.160128000 | -1.020226000 | 0.714308000  |
| H | 0.692193000  | 0.480189000  | 0.320357000  |
| H | 0.328323000  | -0.685520000 | -0.960895000 |

CH<sub>4</sub>-I<sub>2</sub> 0.8

|   |              |              |              |
|---|--------------|--------------|--------------|
| C | -0.032603000 | -0.245329000 | -0.035933000 |
| I | -1.981871883 | -2.198447298 | -0.995055871 |
| I | -3.756750883 | -3.975452298 | -1.867877871 |
| H | -0.980553000 | 0.254481000  | -0.212468000 |
| H | -0.160128000 | -1.020226000 | 0.714308000  |
| H | 0.692193000  | 0.480189000  | 0.320357000  |
| H | 0.328323000  | -0.685520000 | -0.960895000 |

CH<sub>4</sub>-I<sub>2</sub> 0.9

|   |              |              |              |
|---|--------------|--------------|--------------|
| C | -0.032603000 | -0.245329000 | -0.035933000 |
| I | -2.227811515 | -2.444812697 | -1.116047151 |
| I | -4.002690515 | -4.221817697 | -1.988869151 |
| H | -0.980553000 | 0.254481000  | -0.212468000 |
| H | -0.160128000 | -1.020226000 | 0.714308000  |
| H | 0.692193000  | 0.480189000  | 0.320357000  |
| H | 0.328323000  | -0.685520000 | -0.960895000 |

CH<sub>4</sub>-I<sub>2</sub> 1.0

|   |           |           |           |
|---|-----------|-----------|-----------|
| C | -0.032603 | -0.245329 | -0.035933 |
| I | -2.470315 | -2.687736 | -1.235348 |
| I | -4.245194 | -4.464741 | -2.108170 |
| H | -0.980553 | 0.254481  | -0.212468 |

|   |           |           |           |
|---|-----------|-----------|-----------|
| H | -0.160128 | -1.020226 | 0.714308  |
| H | 0.692193  | 0.480189  | 0.320357  |
| H | 0.328323  | -0.685520 | -0.960895 |

CH<sub>4</sub>-I<sub>2</sub> 1.25

|   |              |              |              |
|---|--------------|--------------|--------------|
| C | -0.032603000 | -0.245329000 | -0.035933000 |
| I | -3.067794755 | -3.286250102 | -1.529281270 |
| I | -4.842673755 | -5.063255102 | -2.402103270 |
| H | -0.980553000 | 0.254481000  | -0.212468000 |
| H | -0.160128000 | -1.020226000 | 0.714308000  |
| H | 0.692193000  | 0.480189000  | 0.320357000  |
| H | 0.328323000  | -0.685520000 | -0.960895000 |

CH<sub>4</sub>-I<sub>2</sub> 1.5

|   |              |              |              |
|---|--------------|--------------|--------------|
| C | -0.032603000 | -0.245329000 | -0.035933000 |
| I | -3.657769668 | -3.877246369 | -1.819522493 |
| I | -5.432648668 | -5.654251369 | -2.692344493 |
| H | -0.980553000 | 0.254481000  | -0.212468000 |
| H | -0.160128000 | -1.020226000 | 0.714308000  |
| H | 0.692193000  | 0.480189000  | 0.320357000  |
| H | 0.328323000  | -0.685520000 | -0.960895000 |

CH<sub>4</sub>-I<sub>2</sub> 2.0

|   |              |              |              |
|---|--------------|--------------|--------------|
| C | -0.032603000 | -0.245329000 | -0.035933000 |
| I | -4.826941038 | -5.048441789 | -2.394702423 |
| I | -6.601820038 | -6.825446789 | -3.267524423 |
| H | -0.980553000 | 0.254481000  | -0.212468000 |
| H | -0.160128000 | -1.020226000 | 0.714308000  |
| H | 0.692193000  | 0.480189000  | 0.320357000  |
| H | 0.328323000  | -0.685520000 | -0.960895000 |

CH<sub>4</sub>-CH<sub>3</sub>F 0.7

|   |              |              |              |
|---|--------------|--------------|--------------|
| C | 0.005918650  | -0.003496527 | 1.853878993  |
| F | -1.172542855 | 0.674817567  | 1.614587488  |
| H | 0.830709843  | 0.546048289  | 1.407962789  |
| H | -0.056058041 | -0.993747823 | 1.410355380  |
| H | 0.156078035  | -0.088328739 | 2.927069055  |
| C | -0.150522693 | 0.086684027  | -0.790648205 |
| H | -0.230892991 | 0.132119955  | -1.872148117 |
| H | -1.009338302 | -0.438284667 | -0.384611934 |
| H | 0.760218551  | -0.438926256 | -0.519775671 |
| H | -0.124921141 | 1.093448258  | -0.385984888 |

CH<sub>4</sub>-CH<sub>3</sub>F 0.8



|   |              |              |              |
|---|--------------|--------------|--------------|
| C | 0.005918650  | -0.003496527 | 1.853878993  |
| F | -1.172542855 | 0.674817567  | 1.614587488  |
| H | 0.830709843  | 0.546048289  | 1.407962789  |
| H | -0.056058041 | -0.993747823 | 1.410355380  |
| H | 0.156078035  | -0.088328739 | 2.927069055  |
| C | -0.083381747 | 0.048057171  | -1.146937128 |
| H | -0.163752045 | 0.093493099  | -2.228437040 |
| H | -0.942197356 | -0.476911523 | -0.740900857 |
| H | 0.827359497  | -0.477553112 | -0.876064594 |
| H | -0.057780195 | 1.054821402  | -0.742273811 |

CH<sub>4</sub>-CH<sub>3</sub>F 0.9

|   |              |              |              |
|---|--------------|--------------|--------------|
| C | 0.005918650  | -0.003496527 | 1.853878993  |
| F | -1.172542855 | 0.674817567  | 1.614587488  |
| H | 0.830709843  | 0.546048289  | 1.407962789  |
| H | -0.056058041 | -0.993747823 | 1.410355380  |
| H | 0.156078035  | -0.088328739 | 2.927069055  |
| C | -0.016240801 | 0.009430315  | -1.503226051 |
| H | -0.096611099 | 0.054866243  | -2.584725963 |
| H | -0.875056410 | -0.515538379 | -1.097189780 |
| H | 0.894500443  | -0.516179968 | -1.232353517 |
| H | 0.009360751  | 1.016194546  | -1.098562734 |

CH<sub>4</sub>-CH<sub>3</sub>F 1.0

|   |              |              |              |
|---|--------------|--------------|--------------|
| C | 0.005918650  | -0.003496527 | 1.853878993  |
| F | -1.172542855 | 0.674817567  | 1.614587488  |
| H | 0.830709843  | 0.546048289  | 1.407962789  |
| H | -0.056058041 | -0.993747823 | 1.410355380  |
| H | 0.156078035  | -0.088328739 | 2.927069055  |
| C | 0.047747496  | -0.027382790 | -1.842785183 |
| H | -0.032622802 | 0.018053138  | -2.924285095 |
| H | -0.811068113 | -0.552351484 | -1.436748912 |
| H | 0.958488740  | -0.552993073 | -1.571912649 |
| H | 0.073349048  | 0.979381441  | -1.438121866 |

CH<sub>4</sub>-CH<sub>3</sub>F 1.25

|   |              |              |              |
|---|--------------|--------------|--------------|
| C | 0.005918650  | -0.003496527 | 1.853878993  |
| F | -1.172542855 | 0.674817567  | 1.614587488  |
| H | 0.830709843  | 0.546048289  | 1.407962789  |
| H | -0.056058041 | -0.993747823 | 1.410355380  |
| H | 0.156078035  | -0.088328739 | 2.927069055  |
| C | 0.200245247  | -0.115116267 | -2.652026969 |
| H | 0.119874949  | -0.069680339 | -3.733526881 |
| H | -0.658570362 | -0.640084961 | -2.245990698 |

|   |             |              |              |
|---|-------------|--------------|--------------|
| H | 1.110986491 | -0.640726550 | -2.381154435 |
| H | 0.225846799 | 0.891647964  | -2.247363652 |

CH<sub>4</sub>-CH<sub>3</sub>F 1.5

|   |              |              |              |
|---|--------------|--------------|--------------|
| C | 0.005918650  | -0.003496527 | 1.853878993  |
| F | -1.172542855 | 0.674817567  | 1.614587488  |
| H | 0.830709843  | 0.546048289  | 1.407962789  |
| H | -0.056058041 | -0.993747823 | 1.410355380  |
| H | 0.156078035  | -0.088328739 | 2.927069055  |
| C | 0.347002810  | -0.199547357 | -3.430807984 |
| H | 0.266632512  | -0.154111429 | -4.512307896 |
| H | -0.511812799 | -0.724516051 | -3.024771713 |
| H | 1.257744054  | -0.725157640 | -3.159935450 |
| H | 0.372604362  | 0.807216874  | -3.026144667 |

CH<sub>4</sub>-CH<sub>3</sub>F 2.0

|   |              |              |              |
|---|--------------|--------------|--------------|
| C | 0.005918650  | -0.003496527 | 1.853878993  |
| F | -1.172542855 | 0.674817567  | 1.614587488  |
| H | 0.830709843  | 0.546048289  | 1.407962789  |
| H | -0.056058041 | -0.993747823 | 1.410355380  |
| H | 0.156078035  | -0.088328739 | 2.927069055  |
| C | 0.632758458  | -0.363945430 | -4.947193697 |
| H | 0.552388160  | -0.318509502 | -6.028693609 |
| H | -0.226057151 | -0.888914124 | -4.541157426 |
| H | 1.543499702  | -0.889555713 | -4.676321163 |
| H | 0.658360010  | 0.642818801  | -4.542530380 |

CH<sub>4</sub>-CH<sub>3</sub>Cl 0.7

|    |              |              |              |
|----|--------------|--------------|--------------|
| C  | 0.052125307  | -0.031919514 | 1.840660293  |
| Cl | -1.491715802 | 0.847207403  | 1.755184684  |
| H  | 0.811909110  | 0.554725768  | 1.338264649  |
| H  | -0.067811208 | -0.989274688 | 1.347792712  |
| H  | 0.311197296  | -0.173143788 | 2.883203118  |
| C  | -0.254210436 | 0.145592599  | -0.733801631 |
| H  | -0.326241469 | 0.177245695  | -1.816426056 |
| H  | -1.120601937 | -0.367098082 | -0.327833008 |
| H  | 0.650694225  | -0.383240624 | -0.449706938 |
| H  | -0.224412046 | 1.157892075  | -0.343062947 |

CH<sub>4</sub>-CH<sub>3</sub>Cl 0.8

|    |              |              |             |
|----|--------------|--------------|-------------|
| C  | 0.052125307  | -0.031919514 | 1.840660293 |
| Cl | -1.491715802 | 0.847207403  | 1.755184684 |
| H  | 0.811909110  | 0.554725768  | 1.338264649 |
| H  | -0.067811208 | -0.989274688 | 1.347792712 |

|   |              |              |              |
|---|--------------|--------------|--------------|
| H | 0.311197296  | -0.173143788 | 2.883203118  |
| C | -0.140609484 | 0.081366018  | -1.110009988 |
| H | -0.212640517 | 0.113019114  | -2.192634413 |
| H | -1.007000985 | -0.431324663 | -0.704041365 |
| H | 0.764295177  | -0.447467205 | -0.825915295 |
| H | -0.110811094 | 1.093665494  | -0.719271304 |

CH<sub>4</sub>-CH<sub>3</sub>Cl 0.9

|    |              |              |              |
|----|--------------|--------------|--------------|
| C  | 0.052125307  | -0.031919514 | 1.840660293  |
| Cl | -1.491715802 | 0.847207403  | 1.755184684  |
| H  | 0.811909110  | 0.554725768  | 1.338264649  |
| H  | -0.067811208 | -0.989274688 | 1.347792712  |
| H  | 0.311197296  | -0.173143788 | 2.883203118  |
| C  | -0.027008532 | 0.017139437  | -1.486218345 |
| H  | -0.099039565 | 0.048792533  | -2.568842770 |
| H  | -0.893400033 | -0.495551244 | -1.080249722 |
| H  | 0.877896129  | -0.511693786 | -1.202123652 |
| H  | 0.002789858  | 1.029438913  | -1.095479661 |

CH<sub>4</sub>-CH<sub>3</sub>Cl 1.0

|    |              |              |              |
|----|--------------|--------------|--------------|
| C  | 0.052125307  | -0.031919514 | 1.840660293  |
| Cl | -1.491715802 | 0.847207403  | 1.755184684  |
| H  | 0.811909110  | 0.554725768  | 1.338264649  |
| H  | -0.067811208 | -0.989274688 | 1.347792712  |
| H  | 0.311197296  | -0.173143788 | 2.883203118  |
| C  | 0.077602956  | -0.042004770 | -1.832656606 |
| H  | 0.005571923  | -0.010351674 | -2.915281031 |
| H  | -0.788788545 | -0.554695451 | -1.426687983 |
| H  | 0.982507617  | -0.570837993 | -1.548561913 |
| H  | 0.107401346  | 0.970294706  | -1.441917922 |

CH<sub>4</sub>-CH<sub>3</sub>Cl 1.25

|    |              |              |              |
|----|--------------|--------------|--------------|
| C  | 0.052125307  | -0.031919514 | 1.840660293  |
| Cl | -1.491715802 | 0.847207403  | 1.755184684  |
| H  | 0.811909110  | 0.554725768  | 1.338264649  |
| H  | -0.067811208 | -0.989274688 | 1.347792712  |
| H  | 0.311197296  | -0.173143788 | 2.883203118  |
| C  | 0.320408328  | -0.179279667 | -2.636746790 |
| H  | 0.248377295  | -0.147626571 | -3.719371215 |
| H  | -0.545983173 | -0.691970348 | -2.230778167 |
| H  | 1.225312989  | -0.708112890 | -2.352652097 |
| H  | 0.350206718  | 0.833019809  | -2.246008106 |

CH<sub>4</sub>-CH<sub>3</sub>Cl 1.5

|    |              |              |              |
|----|--------------|--------------|--------------|
| C  | 0.052125307  | -0.031919514 | 1.840660293  |
| Cl | -1.491715802 | 0.847207403  | 1.755184684  |
| H  | 0.811909110  | 0.554725768  | 1.338264649  |
| H  | -0.067811208 | -0.989274688 | 1.347792712  |
| H  | 0.311197296  | -0.173143788 | 2.883203118  |
| C  | 0.549336098  | -0.308708582 | -3.394878996 |
| H  | 0.477305065  | -0.277055486 | -4.477503421 |
| H  | -0.317055403 | -0.821399263 | -2.988910373 |
| H  | 1.454240759  | -0.837541805 | -3.110784303 |
| H  | 0.579134488  | 0.703590894  | -3.004140312 |

CH<sub>4</sub>-CH<sub>3</sub>Cl 2.0

|    |              |              |              |
|----|--------------|--------------|--------------|
| C  | 0.052125307  | -0.031919514 | 1.840660293  |
| Cl | -1.491715802 | 0.847207403  | 1.755184684  |
| H  | 0.811909110  | 0.554725768  | 1.338264649  |
| H  | -0.067811208 | -0.989274688 | 1.347792712  |
| H  | 0.311197296  | -0.173143788 | 2.883203118  |
| C  | 0.988909195  | -0.557230067 | -4.850598074 |
| H  | 0.916878162  | -0.525576971 | -5.933222499 |
| H  | 0.122517694  | -1.069920748 | -4.444629451 |
| H  | 1.893813856  | -1.086063290 | -4.566503381 |
| H  | 1.018707585  | 0.455069409  | -4.459859390 |

CH<sub>4</sub>-CHF<sub>3</sub> 0.7

|   |              |              |              |
|---|--------------|--------------|--------------|
| C | 0.000023411  | 0.000105759  | 2.053285735  |
| F | -1.082526715 | 0.625339904  | 1.589816968  |
| F | 1.082627682  | 0.625237764  | 1.589922249  |
| F | -0.000023860 | -1.249820225 | 1.589264753  |
| H | -0.000041960 | -0.000280062 | 3.138092074  |
| C | -0.000001505 | -5.867E-06   | -0.88199114  |
| H | 0.000004947  | 0.000182705  | -1.96751907  |
| H | -0.885649976 | -0.511523877 | -0.518711019 |
| H | 0.885736072  | -0.51136885  | -0.518700646 |
| H | -0.000092881 | 1.022627583  | -0.518425109 |

CH<sub>4</sub>-CHF<sub>3</sub> 0.8

|   |              |              |              |
|---|--------------|--------------|--------------|
| C | 0.000023411  | 0.000105759  | 2.053285735  |
| F | -1.082526715 | 0.625339904  | 1.589816968  |
| F | 1.082627682  | 0.625237764  | 1.589922249  |
| F | -0.000023860 | -1.249820225 | 1.589264753  |
| H | -0.000041960 | -0.000280062 | 3.138092074  |
| C | -0.000005209 | -0.000039061 | -1.254630614 |
| H | 0.000001243  | 0.000149511  | -2.340158544 |
| H | -0.885653680 | -0.511557071 | -0.891350493 |

|   |              |              |              |
|---|--------------|--------------|--------------|
| H | 0.885732368  | -0.511402044 | -0.891340120 |
| H | -0.000096585 | 1.022594389  | -0.891064583 |

CH<sub>4</sub>-CHF<sub>3</sub> 0.9

|   |              |              |              |
|---|--------------|--------------|--------------|
| C | 0.000023411  | 0.000105759  | 2.053285735  |
| F | -1.082526715 | 0.625339904  | 1.589816968  |
| F | 1.082627682  | 0.625237764  | 1.589922249  |
| F | -0.000023860 | -1.249820225 | 1.589264753  |
| H | -0.000041960 | -0.000280062 | 3.138092074  |
| C | -0.000008913 | -0.000072255 | -1.627270088 |
| H | -0.000002461 | 0.000116317  | -2.712798018 |
| H | -0.885657384 | -0.511590265 | -1.263989967 |
| H | 0.885728664  | -0.511435238 | -1.263979594 |
| H | -0.000100289 | 1.022561195  | -1.263704057 |

CH<sub>4</sub>-CHF<sub>3</sub> 1.0

|   |              |              |              |
|---|--------------|--------------|--------------|
| C | 0.000023411  | 0.000105759  | 2.053285735  |
| F | -1.082526715 | 0.625339904  | 1.589816968  |
| F | 1.082627682  | 0.625237764  | 1.589922249  |
| F | -0.000023860 | -1.249820225 | 1.589264753  |
| H | -0.000041960 | -0.000280062 | 3.138092074  |
| C | -0.000012548 | -0.000104834 | -1.992998099 |
| H | -0.000006096 | 0.000083738  | -3.078526029 |
| H | -0.885661019 | -0.511622844 | -1.629717978 |
| H | 0.885725029  | -0.511467817 | -1.629707605 |
| H | -0.000103924 | 1.022528616  | -1.629432068 |

CH<sub>4</sub>-CHF<sub>3</sub> 1.25

|   |              |              |              |
|---|--------------|--------------|--------------|
| C | 0.000023411  | 0.000105759  | 2.053285735  |
| F | -1.082526715 | 0.625339904  | 1.589816968  |
| F | 1.082627682  | 0.625237764  | 1.589922249  |
| F | -0.000023860 | -1.249820225 | 1.589264753  |
| H | -0.000041960 | -0.000280062 | 3.138092074  |
| C | -0.000021461 | -0.000184713 | -2.889721919 |
| H | -0.000015009 | 0.000003859  | -3.975249849 |
| H | -0.885669932 | -0.511702723 | -2.526441798 |
| H | 0.885716116  | -0.511547696 | -2.526431425 |
| H | -0.000112837 | 1.022448737  | -2.526155888 |

CH<sub>4</sub>-CHF<sub>3</sub> 1.5

|   |              |              |             |
|---|--------------|--------------|-------------|
| C | 0.000023411  | 0.000105759  | 2.053285735 |
| F | -1.082526715 | 0.625339904  | 1.589816968 |
| F | 1.082627682  | 0.625237764  | 1.589922249 |
| F | -0.000023860 | -1.249820225 | 1.589264753 |

|   |              |              |              |
|---|--------------|--------------|--------------|
| H | -0.000041960 | -0.000280062 | 3.138092074  |
| C | -0.000030228 | -0.000263279 | -3.771712327 |
| H | -0.000023776 | -0.000074707 | -4.857240257 |
| H | -0.885678699 | -0.511781289 | -3.408432206 |
| H | 0.885707349  | -0.511626262 | -3.408421833 |
| H | -0.000121604 | 1.022370171  | -3.408146296 |

CH<sub>4</sub>-CHF<sub>3</sub> 2.0

|   |              |              |              |
|---|--------------|--------------|--------------|
| C | 0.000023411  | 0.000105759  | 2.053285735  |
| F | -1.082526715 | 0.625339904  | 1.589816968  |
| F | 1.082627682  | 0.625237764  | 1.589922249  |
| F | -0.000023860 | -1.249820225 | 1.589264753  |
| H | -0.000041960 | -0.000280062 | 3.138092074  |
| C | -0.000047553 | -0.000418544 | -5.514713708 |
| H | -0.000041101 | -0.000229972 | -6.600241638 |
| H | -0.885696024 | -0.511936554 | -5.151433587 |
| H | 0.885690024  | -0.511781527 | -5.151423214 |
| H | -0.000138929 | 1.022214906  | -5.151147677 |

CH<sub>4</sub>-CHCl<sub>3</sub> 0.7

|    |              |              |              |
|----|--------------|--------------|--------------|
| C  | -0.000028509 | -0.000461929 | 2.158149022  |
| Cl | -1.454063734 | 0.838777303  | 1.616235012  |
| Cl | 1.454144531  | 0.838659727  | 1.616208515  |
| Cl | -0.000087400 | -1.679795034 | 1.617802938  |
| H  | 0.000005696  | 0.000267325  | 3.239305949  |
| C  | -0.000020378 | 0.000101581  | -0.829012152 |
| H  | 0.00002731   | -0.00176743  | -1.914768206 |
| H  | -0.88549756  | -0.510632424 | -0.463880631 |
| H  | 0.88562606   | -0.510482141 | -0.463844203 |
| H  | -0.000090521 | 1.023277977  | -0.466499953 |

CH<sub>4</sub>-CHCl<sub>3</sub> 0.8

|    |              |              |              |
|----|--------------|--------------|--------------|
| C  | -0.000028509 | -0.000461929 | 2.158149022  |
| Cl | -1.454063734 | 0.838777303  | 1.616235012  |
| Cl | 1.454144531  | 0.838659727  | 1.616208515  |
| Cl | -0.000087400 | -1.679795034 | 1.617802938  |
| H  | 0.000005696  | 0.000267325  | 3.239305949  |
| C  | -0.000021421 | 0.000239906  | -1.240255582 |
| H  | 0.000026267  | -0.001629105 | -2.326011636 |
| H  | -0.885498603 | -0.510494099 | -0.875124061 |
| H  | 0.885625017  | -0.510343816 | -0.875087633 |
| H  | -0.000091564 | 1.023416302  | -0.877743383 |

CH<sub>4</sub>-CHCl<sub>3</sub> 0.9

|    |              |              |              |
|----|--------------|--------------|--------------|
| C  | -0.000028509 | -0.000461929 | 2.158149022  |
| Cl | -1.454063734 | 0.838777303  | 1.616235012  |
| Cl | 1.454144531  | 0.838659727  | 1.616208515  |
| Cl | -0.000087400 | -1.679795034 | 1.617802938  |
| H  | 0.000005696  | 0.000267325  | 3.239305949  |
| C  | -0.000022464 | 0.000378231  | -1.651499012 |
| H  | 0.000025224  | -0.001490780 | -2.737255066 |
| H  | -0.885499646 | -0.510355774 | -1.286367491 |
| H  | 0.885623974  | -0.510205491 | -1.286331063 |
| H  | -0.000092607 | 1.023554627  | -1.288986813 |

CH<sub>4</sub>-CHCl<sub>3</sub> 1.0

|    |              |              |              |
|----|--------------|--------------|--------------|
| C  | -0.000028509 | -0.000461929 | 2.158149022  |
| Cl | -1.454063734 | 0.838777303  | 1.616235012  |
| Cl | 1.454144531  | 0.838659727  | 1.616208515  |
| Cl | -0.000087400 | -1.679795034 | 1.617802938  |
| H  | 0.000005696  | 0.000267325  | 3.239305949  |
| C  | -0.000023477 | 0.000512590  | -2.050951410 |
| H  | 0.000024211  | -0.001356421 | -3.136707464 |
| H  | -0.885500659 | -0.510221415 | -1.685819889 |
| H  | 0.885622961  | -0.510071132 | -1.685783461 |
| H  | -0.000093620 | 1.023688986  | -1.688439211 |

CH<sub>4</sub>-CHCl<sub>3</sub> 1.25

|    |              |              |              |
|----|--------------|--------------|--------------|
| C  | -0.000028509 | -0.000461929 | 2.158149022  |
| Cl | -1.454063734 | 0.838777303  | 1.616235012  |
| Cl | 1.454144531  | 0.838659727  | 1.616208515  |
| Cl | -0.000087400 | -1.679795034 | 1.617802938  |
| H  | 0.000005696  | 0.000267325  | 3.239305949  |
| C  | -0.000025935 | 0.000838583  | -3.020135282 |
| H  | 0.000021753  | -0.001030428 | -4.105891336 |
| H  | -0.885503117 | -0.509895422 | -2.655003761 |
| H  | 0.885620503  | -0.509745139 | -2.654967333 |
| H  | -0.000096078 | 1.024014979  | -2.657623083 |

CH<sub>4</sub>-CHCl<sub>3</sub> 1.5

|    |              |              |              |
|----|--------------|--------------|--------------|
| C  | -0.000028509 | -0.000461929 | 2.158149022  |
| Cl | -1.454063734 | 0.838777303  | 1.616235012  |
| Cl | 1.454144531  | 0.838659727  | 1.616208515  |
| Cl | -0.000087400 | -1.679795034 | 1.617802938  |
| H  | 0.000005696  | 0.000267325  | 3.239305949  |
| C  | -0.000028332 | 0.001156578  | -3.965541535 |
| H  | 0.000019356  | -0.000712433 | -5.051297589 |
| H  | -0.885505514 | -0.509577427 | -3.600410014 |

|   |              |              |              |
|---|--------------|--------------|--------------|
| H | 0.885618106  | -0.509427144 | -3.600373586 |
| H | -0.000098475 | 1.024332974  | -3.603029336 |

CH<sub>4</sub>-CHCl<sub>3</sub> 2.0

|    |              |              |              |
|----|--------------|--------------|--------------|
| C  | -0.000028509 | -0.000461929 | 2.158149022  |
| Cl | -1.454063734 | 0.838777303  | 1.616235012  |
| Cl | 1.454144531  | 0.838659727  | 1.616208515  |
| Cl | -0.000087400 | -1.679795034 | 1.617802938  |
| H  | 0.000005696  | 0.000267325  | 3.239305949  |
| C  | -0.000033043 | 0.001781404  | -5.823159317 |
| H  | 0.000014645  | -0.000087607 | -6.908915371 |
| H  | -0.885510225 | -0.508952601 | -5.458027796 |
| H  | 0.885613395  | -0.508802318 | -5.457991368 |
| H  | -0.000103186 | 1.024957800  | -5.460647118 |

CH<sub>3</sub>F-CH<sub>3</sub>F 0.7

|   |              |              |              |
|---|--------------|--------------|--------------|
| C | 0.250211388  | -0.141261283 | 2.278305952  |
| F | 0.055015573  | -0.060688554 | 0.911538424  |
| H | 1.189310250  | 0.342978795  | 2.531275149  |
| H | 0.282891774  | -1.187166859 | 2.570525524  |
| H | -0.571443596 | 0.358513497  | 2.783864006  |
| C | -0.139515065 | 0.072084244  | -1.211198078 |
| F | -0.270371254 | 0.175266689  | -2.58454131  |
| H | -0.990708073 | -0.470513541 | -0.810432282 |
| H | 0.777569057  | -0.46114603  | -0.978318201 |
| H | -0.103714934 | 1.067817603  | -0.779120993 |

CH<sub>3</sub>F-CH<sub>3</sub>F 0.8

|   |              |              |              |
|---|--------------|--------------|--------------|
| C | 0.250211388  | -0.141261283 | 2.278305952  |
| F | 0.055015573  | -0.060688554 | 0.911538424  |
| H | 1.189310250  | 0.342978795  | 2.531275149  |
| H | 0.282891774  | -1.187166859 | 2.570525524  |
| H | -0.571443596 | 0.358513497  | 2.783864006  |
| C | -0.171682962 | 0.092497084  | -1.527470165 |
| F | -0.302539151 | 0.195679529  | -2.900813397 |
| H | -1.022875970 | -0.450100701 | -1.126704369 |
| H | 0.745401160  | -0.440733190 | -1.294590288 |
| H | -0.135882831 | 1.088230443  | -1.095393080 |

CH<sub>3</sub>F-CH<sub>3</sub>F 0.9

|   |             |              |             |
|---|-------------|--------------|-------------|
| C | 0.250211388 | -0.141261283 | 2.278305952 |
| F | 0.055015573 | -0.060688554 | 0.911538424 |
| H | 1.189310250 | 0.342978795  | 2.531275149 |
| H | 0.282891774 | -1.187166859 | 2.570525524 |



|   |              |              |              |
|---|--------------|--------------|--------------|
| H | -0.571443596 | 0.358513497  | 2.783864006  |
| C | -0.203850859 | 0.112909924  | -1.843742252 |
| F | -0.334707048 | 0.216092369  | -3.217085484 |
| H | -1.055043867 | -0.429687861 | -1.442976456 |
| H | 0.713233263  | -0.420320350 | -1.610862375 |
| H | -0.168050728 | 1.108643283  | -1.411665167 |

CH<sub>3</sub>F-CH<sub>3</sub>F 1.0

|   |              |              |              |
|---|--------------|--------------|--------------|
| C | 0.250211388  | -0.141261283 | 2.278305952  |
| F | 0.055015573  | -0.060688554 | 0.911538424  |
| H | 1.189310250  | 0.342978795  | 2.531275149  |
| H | 0.282891774  | -1.187166859 | 2.570525524  |
| H | -0.571443596 | 0.358513497  | 2.783864006  |
| C | -0.235364089 | 0.132907332  | -2.153577716 |
| F | -0.366220278 | 0.236089777  | -3.526920948 |
| H | -1.086557097 | -0.409690453 | -1.752811920 |
| H | 0.681720033  | -0.400322942 | -1.920697839 |
| H | -0.199563958 | 1.128640691  | -1.721500631 |

CH<sub>3</sub>F-CH<sub>3</sub>F 1.25

|   |              |              |              |
|---|--------------|--------------|--------------|
| C | 0.250211388  | -0.141261283 | 2.278305952  |
| F | 0.055015573  | -0.060688554 | 0.911538424  |
| H | 1.189310250  | 0.342978795  | 2.531275149  |
| H | 0.282891774  | -1.187166859 | 2.570525524  |
| H | -0.571443596 | 0.358513497  | 2.783864006  |
| C | -0.312494045 | 0.181851828  | -2.911913043 |
| F | -0.443350234 | 0.285034273  | -4.285256275 |
| H | -1.163687053 | -0.360745957 | -2.511147247 |
| H | 0.604590077  | -0.351378446 | -2.679033166 |
| H | -0.276693914 | 1.177585187  | -2.479835958 |

CH<sub>3</sub>F-CH<sub>3</sub>F 1.5

|   |              |              |              |
|---|--------------|--------------|--------------|
| C | 0.250211388  | -0.141261283 | 2.278305952  |
| F | 0.055015573  | -0.060688554 | 0.911538424  |
| H | 1.189310250  | 0.342978795  | 2.531275149  |
| H | 0.282891774  | -1.187166859 | 2.570525524  |
| H | -0.571443596 | 0.358513497  | 2.783864006  |
| C | -0.388243394 | 0.229920230  | -3.656674352 |
| F | -0.519099583 | 0.333102675  | -5.030017584 |
| H | -1.239436402 | -0.312677555 | -3.255908556 |
| H | 0.528840728  | -0.303310044 | -3.423794475 |
| H | -0.352443263 | 1.225653589  | -3.224597267 |

CH<sub>3</sub>F-CH<sub>3</sub>F 2.0

|   |              |              |              |
|---|--------------|--------------|--------------|
| C | 0.250211388  | -0.141261283 | 2.278305952  |
| F | 0.055015573  | -0.060688554 | 0.911538424  |
| H | 1.189310250  | 0.342978795  | 2.531275149  |
| H | 0.282891774  | -1.187166859 | 2.570525524  |
| H | -0.571443596 | 0.358513497  | 2.783864006  |
| C | -0.537785093 | 0.324815177  | -5.126955922 |
| F | -0.668641282 | 0.427997622  | -6.500299154 |
| H | -1.388978101 | -0.217782608 | -4.726190126 |
| H | 0.379299029  | -0.208415097 | -4.894076045 |
| H | -0.501984962 | 1.320548536  | -4.694878837 |

CH<sub>3</sub>Cl-CH<sub>3</sub>Cl 0.7

|    |              |              |              |
|----|--------------|--------------|--------------|
| C  | 0.301152114  | -0.173118099 | 2.764480435  |
| Cl | -0.024870834 | -0.077582132 | 1.017161127  |
| H  | 1.247502252  | 0.314602623  | 2.964654708  |
| H  | 0.346131151  | -1.217442126 | 3.048836143  |
| H  | -0.501709016 | 0.328185531  | 3.291345152  |
| C  | -0.167178835 | 0.086892488  | -1.431079387 |
| Cl | -0.349835401 | 0.206306254  | -3.197592322 |
| H  | -1.016179191 | -0.454796092 | -1.031499545 |
| H  | 0.75261494   | -0.442221946 | -1.212821816 |
| H  | -0.131752165 | 1.087868141  | -1.018190727 |

CH<sub>3</sub>Cl-CH<sub>3</sub>Cl 0.8

|    |              |              |              |
|----|--------------|--------------|--------------|
| C  | 0.301152114  | -0.173118099 | 2.764480435  |
| Cl | -0.024870834 | -0.077582132 | 1.017161127  |
| H  | 1.247502252  | 0.314602623  | 2.964654708  |
| H  | 0.346131151  | -1.217442126 | 3.048836143  |
| H  | -0.501709016 | 0.328185531  | 3.291345152  |
| C  | -0.197707281 | 0.109748582  | -1.778991069 |
| Cl | -0.380363847 | 0.229162348  | -3.545504004 |
| H  | -1.046707637 | -0.431939998 | -1.379411227 |
| H  | 0.722086494  | -0.419365852 | -1.560733498 |
| H  | -0.162280611 | 1.110724235  | -1.366102409 |

CH<sub>3</sub>Cl-CH<sub>3</sub>Cl 0.9

|    |              |              |              |
|----|--------------|--------------|--------------|
| C  | 0.301152114  | -0.173118099 | 2.764480435  |
| Cl | -0.024870834 | -0.077582132 | 1.017161127  |
| H  | 1.247502252  | 0.314602623  | 2.964654708  |
| H  | 0.346131151  | -1.217442126 | 3.048836143  |
| H  | -0.501709016 | 0.328185531  | 3.291345152  |
| C  | -0.228235727 | 0.132604676  | -2.126902751 |
| Cl | -0.410892293 | 0.252018442  | -3.893415686 |
| H  | -1.077236083 | -0.409083904 | -1.727322909 |

|   |              |              |              |
|---|--------------|--------------|--------------|
| H | 0.691558048  | -0.396509758 | -1.908645180 |
| H | -0.192809057 | 1.133580329  | -1.714014091 |

CH<sub>3</sub>Cl-CH<sub>3</sub>Cl 1.0

|    |              |              |              |
|----|--------------|--------------|--------------|
| C  | 0.301152114  | -0.173118099 | 2.764480435  |
| Cl | -0.024870834 | -0.077582132 | 1.017161127  |
| H  | 1.247502252  | 0.314602623  | 2.964654708  |
| H  | 0.346131151  | -1.217442126 | 3.048836143  |
| H  | -0.501709016 | 0.328185531  | 3.291345152  |
| C  | -0.258353838 | 0.155153560  | -2.470138140 |
| Cl | -0.441010404 | 0.274567326  | -4.236651075 |
| H  | -1.107354194 | -0.386535020 | -2.070558298 |
| H  | 0.661439937  | -0.373960874 | -2.251880569 |
| H  | -0.222927168 | 1.156129213  | -2.057249480 |

CH<sub>3</sub>Cl-CH<sub>3</sub>Cl 1.25

|    |              |              |              |
|----|--------------|--------------|--------------|
| C  | 0.301152114  | -0.173118099 | 2.764480435  |
| Cl | -0.024870834 | -0.077582132 | 1.017161127  |
| H  | 1.247502252  | 0.314602623  | 2.964654708  |
| H  | 0.346131151  | -1.217442126 | 3.048836143  |
| H  | -0.501709016 | 0.328185531  | 3.291345152  |
| C  | -0.332603474 | 0.210742916  | -3.316310144 |
| Cl | -0.515260040 | 0.330156682  | -5.082823079 |
| H  | -1.181603830 | -0.330945664 | -2.916730302 |
| H  | 0.587190301  | -0.318371518 | -3.098052573 |
| H  | -0.297176804 | 1.211718569  | -2.903421484 |

CH<sub>3</sub>Cl-CH<sub>3</sub>Cl 1.5

|    |              |              |              |
|----|--------------|--------------|--------------|
| C  | 0.301152114  | -0.173118099 | 2.764480435  |
| Cl | -0.024870834 | -0.077582132 | 1.017161127  |
| H  | 1.247502252  | 0.314602623  | 2.964654708  |
| H  | 0.346131151  | -1.217442126 | 3.048836143  |
| H  | -0.501709016 | 0.328185531  | 3.291345152  |
| C  | -0.405954921 | 0.265659815  | -4.152246112 |
| Cl | -0.588611487 | 0.385073581  | -5.918759047 |
| H  | -1.254955277 | -0.276028765 | -3.752666270 |
| H  | 0.513838854  | -0.263454619 | -3.933988541 |
| H  | -0.370528251 | 1.266635468  | -3.739357452 |

CH<sub>3</sub>Cl-CH<sub>3</sub>Cl 2.0

|    |              |              |             |
|----|--------------|--------------|-------------|
| C  | 0.301152114  | -0.173118099 | 2.764480435 |
| Cl | -0.024870834 | -0.077582132 | 1.017161127 |
| H  | 1.247502252  | 0.314602623  | 2.964654708 |
| H  | 0.346131151  | -1.217442126 | 3.048836143 |

```

H   -0.501709016   0.328185531   3.291345152
C   -0.551367228   0.374527373  -5.809410101
Cl  -0.734023794   0.493941139  -7.575923036
H   -1.400367584  -0.167161207  -5.409830259
H    0.368426547  -0.154587061  -5.591152530
H   -0.515940558   1.375503026  -5.396521441

```

S2 Total energies of ten molecules at different inter-molecule distance by CCSD(T)-

PP/aug-cc-pVTZ.(unit:a.u.)

| Molecules                             | 0.7        | 0.8        | 0.9        | 1.0        | 1.25       | 1.5        | 2.0        |
|---------------------------------------|------------|------------|------------|------------|------------|------------|------------|
| CH <sub>4</sub> -F <sub>2</sub>       | -56.457233 | -56.462558 | -56.463595 | -56.463501 | -56.462903 | -56.462635 | -56.462475 |
| CH <sub>4</sub> -Cl <sub>2</sub>      | -37.932635 | -37.950927 | -37.955075 | -37.955335 | -37.954111 | -37.953533 | -37.953242 |
| CH <sub>4</sub> -Br <sub>2</sub>      | -34.695192 | -34.717478 | -34.722899 | -34.723416 | -34.722067 | -34.721419 | -34.721089 |
| CH <sub>4</sub> -I <sub>2</sub>       | -30.832037 | -30.856076 | -30.861779 | -30.862220 | -30.860590 | -30.859857 | -30.859506 |
| CH <sub>3</sub> F-CH <sub>3</sub> F   | -63.466916 | -63.482055 | -63.485297 | -63.485411 | -63.484249 | -63.483602 | -63.483095 |
| CH <sub>3</sub> Cl-CH <sub>3</sub> Cl | -44.840328 | -44.856718 | -44.860427 | -44.860683 | -44.859588 | -44.858980 | -44.858596 |
| CH <sub>3</sub> F-CH <sub>4</sub>     | -39.803573 | -39.814673 | -39.816857 | -39.816845 | -39.816065 | -39.815734 | -39.815562 |
| CH <sub>3</sub> Cl-CH <sub>4</sub>    | -30.482110 | -30.501067 | -30.504959 | -30.505109 | -30.504107 | -30.503642 | -30.503396 |
| CHF <sub>3</sub> -CH <sub>4</sub>     | -87.192938 | -87.201309 | -87.202613 | -87.202370 | -87.201536 | -87.201243 | -87.201099 |
| CHCl <sub>3</sub> -CH <sub>4</sub>    | -59.191482 | -59.208779 | -59.212568 | -59.212620 | -59.211310 | -59.210764 | -59.210498 |

S3 Total energies of ten molecules at different inter-molecule distance by CCSD(T)-

PP/aug-cc-pVQZ. (unit:a.u.)

| Molecules                             | 0.7        | 0.8        | 0.9        | 1.0        | 1.25       | 1.5        | 2.0        |
|---------------------------------------|------------|------------|------------|------------|------------|------------|------------|
| CH <sub>4</sub> -F <sub>2</sub>       | -56.505165 | -56.510497 | -56.511583 | -56.511551 | -56.511050 | -56.510836 | -56.510727 |
| CH <sub>4</sub> -Cl <sub>2</sub>      | -37.983641 | -38.001427 | -38.005387 | -38.005609 | -38.004497 | -38.004015 | -38.003792 |
| CH <sub>4</sub> -Br <sub>2</sub>      | -34.753135 | -34.774966 | -34.780150 | -34.780576 | -34.779233 | -34.778620 | -34.778345 |
| CH <sub>4</sub> -I <sub>2</sub>       | -30.899444 | -30.923203 | -30.928944 | -30.929485 | -30.928090 | -30.927451 | -30.927168 |
| CH <sub>3</sub> F-CH <sub>3</sub> F   | -63.523964 | -63.539072 | -63.542339 | -63.542478 | -63.541357 | -63.540729 | -63.540254 |
| CH <sub>3</sub> Cl-CH <sub>3</sub> Cl | -44.898316 | -44.914383 | -44.917980 | -44.918212 | -44.917165 | -44.916631 | -44.916276 |
| CH <sub>3</sub> F-CH <sub>4</sub>     | -39.840367 | -39.851448 | -39.853686 | -39.853724 | -39.853010 | -39.852699 | -39.852546 |
| CH <sub>3</sub> Cl-CH <sub>4</sub>    | -30.519149 | -30.538056 | -30.542008 | -30.542223 | -30.541295 | -30.540865 | -30.540646 |
| CHF <sub>3</sub> -CH <sub>4</sub>     | -87.269929 | -87.278436 | -87.279903 | -87.279750 | -87.279035 | -87.278776 | -87.278662 |
| CHCl <sub>3</sub> -CH <sub>4</sub>    | -59.269138 | -59.286483 | -59.290467 | -59.290668 | -59.289473 | -59.288965 | -59.288739 |

S4 Total energies of ten molecules at different inter-molecule distance by CCSD-PP/aug-cc-pVTZ. (unit:a.u.)

| Molecules                             | 0.7        | 0.8        | 0.9        | 1.0        | 1.25       | 1.5        | 2.0        |
|---------------------------------------|------------|------------|------------|------------|------------|------------|------------|
| CH <sub>4</sub> -F <sub>2</sub>       | -56.430356 | -56.436144 | -56.437420 | -56.437453 | -56.436976 | -56.436740 | -56.436596 |
| CH <sub>4</sub> -Cl <sub>2</sub>      | -37.903662 | -37.922867 | -37.927516 | -37.928052 | -37.927103 | -37.926599 | -37.926340 |
| CH <sub>4</sub> -Br <sub>2</sub>      | -34.671241 | -34.694497 | -34.700465 | -34.701293 | -34.700263 | -34.699699 | -34.699408 |
| CH <sub>4</sub> -I <sub>2</sub>       | -30.809269 | -30.834271 | -30.840554 | -30.841334 | -30.840064 | -30.839427 | -30.839118 |
| CH <sub>3</sub> F-CH <sub>3</sub> F   | -63.437443 | -63.452985 | -63.456464 | -63.456711 | -63.455677 | -63.455060 | -63.454561 |
| CH <sub>3</sub> Cl-CH <sub>3</sub> Cl | -44.804713 | -44.821870 | -44.826008 | -44.826504 | -44.825651 | -44.825109 | -44.824753 |
| CH <sub>3</sub> F-CH <sub>4</sub>     | -39.781732 | -39.793303 | -39.795769 | -39.795916 | -39.795296 | -39.795008 | -39.794855 |
| CH <sub>3</sub> Cl-CH <sub>4</sub>    | -30.457020 | -30.476714 | -30.481033 | -30.481414 | -30.480641 | -30.480241 | -30.480024 |
| CHF <sub>3</sub> -CH <sub>4</sub>     | -87.154671 | -87.163466 | -87.165030 | -87.164938 | -87.164257 | -87.164002 | -87.163876 |
| CHCl <sub>3</sub> -CH <sub>4</sub>    | -59.142183 | -59.160448 | -59.164809 | -59.165186 | -59.164202 | -59.163741 | -59.163513 |

S5 Total energies of ten molecules at different inter-molecule distance by CCSD-

PP/aug-cc-pVQZ.(unit:a.u.)

| Molecules                             | 0.7        | 0.8        | 0.9        | 1.0        | 1.25       | 1.5        | 2.0        |
|---------------------------------------|------------|------------|------------|------------|------------|------------|------------|
| CH <sub>4</sub> -F <sub>2</sub>       | -56.475959 | -56.481766 | -56.483094 | -56.483189 | -56.482810 | -56.482628 | -56.482533 |
| CH <sub>4</sub> -Cl <sub>2</sub>      | -37.950560 | -37.969324 | -37.973815 | -37.974327 | -37.973493 | -37.973080 | -37.972887 |
| CH <sub>4</sub> -Br <sub>2</sub>      | -34.725262 | -34.748117 | -34.753890 | -34.754649 | -34.753643 | -34.753116 | -34.752876 |
| CH <sub>4</sub> -I <sub>2</sub>       | -30.871771 | -30.896533 | -30.902877 | -30.903769 | -30.902734 | -30.902188 | -30.901942 |
| CH <sub>3</sub> F-CH <sub>3</sub> F   | -63.491898 | -63.507422 | -63.510931 | -63.511207 | -63.510220 | -63.509622 | -63.509154 |
| CH <sub>3</sub> Cl-CH <sub>3</sub> Cl | -44.858345 | -44.875234 | -44.879287 | -44.879772 | -44.878975 | -44.878503 | -44.878175 |
| CH <sub>3</sub> F-CH <sub>4</sub>     | -39.816789 | -39.828360 | -39.830885 | -39.831083 | -39.830531 | -39.830263 | -39.830130 |
| CH <sub>3</sub> Cl-CH <sub>4</sub>    | -30.491448 | -30.511126 | -30.515519 | -30.515968 | -30.515274 | -30.514908 | -30.514718 |
| CHF <sub>3</sub> -CH <sub>4</sub>     | -87.228214 | -87.237154 | -87.238882 | -87.238879 | -87.238315 | -87.238095 | -87.237998 |
| CHCl <sub>3</sub> -CH <sub>4</sub>    | -59.213646 | -59.232006 | -59.236580 | -59.237112 | -59.236247 | -59.235826 | -59.235636 |

S6 Total energies of ten molecules at different inter-molecule distance by MP2-PP/aug-cc-pVTZ.(unit:a.u.)

| Molecules                             | 0.7        | 0.8        | 0.9        | 1.0        | 1.25       | 1.5        | 2.0        |
|---------------------------------------|------------|------------|------------|------------|------------|------------|------------|
| CH <sub>4</sub> -F <sub>2</sub>       | -56.404164 | -56.409122 | -56.410018 | -56.409873 | -56.409243 | -56.408969 | -56.408807 |
| CH <sub>4</sub> -Cl <sub>2</sub>      | -37.854400 | -37.871435 | -37.875035 | -37.875057 | -37.873650 | -37.873028 | -37.872713 |
| CH <sub>4</sub> -Br <sub>2</sub>      | -34.628427 | -34.649346 | -34.654124 | -34.654353 | -34.652777 | -34.652075 | -34.651718 |
| CH <sub>4</sub> -I <sub>2</sub>       | -30.767789 | -30.790614 | -30.795708 | -30.795870 | -30.794019 | -30.793231 | -30.792853 |
| CH <sub>3</sub> F-CH <sub>3</sub> F   | -63.401685 | -63.416729 | -63.420024 | -63.420206 | -63.419136 | -63.418515 | -63.418020 |
| CH <sub>3</sub> Cl-CH <sub>3</sub> Cl | -44.745537 | -44.761100 | -44.764461 | -44.764571 | -44.763369 | -44.762735 | -44.762333 |
| CH <sub>3</sub> F-CH <sub>4</sub>     | -39.743815 | -39.754879 | -39.757108 | -39.757142 | -39.756420 | -39.756104 | -39.755936 |
| CH <sub>3</sub> Cl-CH <sub>4</sub>    | -30.407636 | -30.426115 | -30.429838 | -30.429936 | -30.428909 | -30.428439 | -30.428186 |
| CHF <sub>3</sub> -CH <sub>4</sub>     | -87.123627 | -87.132105 | -87.133528 | -87.133366 | -87.132614 | -87.132339 | -87.132202 |
| CHCl <sub>3</sub> -CH <sub>4</sub>    | -59.079209 | -59.095616 | -59.099006 | -59.098886 | -59.097447 | -59.096868 | -59.096583 |



S7 Total energies of ten molecules at different inter-molecule distance by MP2-PP/aug-cc-pVQZ.(unit:a.u.)

| Molecules                             | 0.7        | 0.8        | 0.9        | 1.0        | 1.25       | 1.5        | 2.0        |
|---------------------------------------|------------|------------|------------|------------|------------|------------|------------|
| CH <sub>4</sub> -F <sub>2</sub>       | -56.456412 | -56.461368 | -56.462302 | -56.462208 | -56.461659 | -56.461432 | -56.461317 |
| CH <sub>4</sub> -Cl <sub>2</sub>      | -37.906982 | -37.923497 | -37.926893 | -37.926871 | -37.925568 | -37.925038 | -37.924792 |
| CH <sub>4</sub> -Br <sub>2</sub>      | -34.687865 | -34.708289 | -34.712808 | -34.712928 | -34.711335 | -34.710657 | -34.710351 |
| CH <sub>4</sub> -I <sub>2</sub>       | -30.834271 | -30.856736 | -30.861816 | -30.862040 | -30.860371 | -30.859661 | -30.859342 |
| CH <sub>3</sub> F-CH <sub>3</sub> F   | -63.464311 | -63.479313 | -63.482622 | -63.482822 | -63.481787 | -63.481184 | -63.480719 |
| CH <sub>3</sub> Cl-CH <sub>3</sub> Cl | -44.806760 | -44.821972 | -44.825208 | -44.825288 | -44.824116 | -44.823545 | -44.823169 |
| CH <sub>3</sub> F-CH <sub>4</sub>     | -39.785545 | -39.796570 | -39.798839 | -39.798916 | -39.798248 | -39.797947 | -39.797797 |
| CH <sub>3</sub> Cl-CH <sub>4</sub>    | -30.448500 | -30.466867 | -30.470619 | -30.470768 | -30.469796 | -30.469352 | -30.469122 |
| CHF <sub>3</sub> -CH <sub>4</sub>     | -87.206755 | -87.215348 | -87.216916 | -87.216830 | -87.216182 | -87.215936 | -87.215825 |
| CHCl <sub>3</sub> -CH <sub>4</sub>    | -59.159825 | -59.176183 | -59.179717 | -59.179718 | -59.178358 | -59.177807 | -59.177557 |

S8 Total energies and error bars of ten molecules at different inter-molecule distance

by DMC-Tmoves/aug-cc-pVTZ.(unit:a.u.)

| Molecules                             | 0.7         | 0.8         | 0.9         | 1.0         | 1.25        | 1.5         | 2.0         |
|---------------------------------------|-------------|-------------|-------------|-------------|-------------|-------------|-------------|
| CH <sub>4</sub> -F <sub>2</sub>       | -56.491448/ | -56.496927/ | -56.498157/ | -56.498239/ | -56.497528/ | -56.497488/ | -56.497457/ |
|                                       | 0.000104    | 0.000105    | 0.000095    | 0.000102    | 0.0001      | 0.000095    | 0.000094    |
| CH <sub>4</sub> -Cl <sub>2</sub>      | -37.987598/ | -38.005422/ | -38.00977/  | -38.00957/  | -38.008951/ | -38.009299/ | -38.009183/ |
|                                       | 0.000095    | 0.000096    | 0.000099    | 0.000105    | 0.000099    | 0.000088    | 0.000087    |
| CH <sub>4</sub> -Br <sub>2</sub>      | -34.763236/ | -34.78625/  | -34.791827/ | -34.791995/ | -34.791197/ | -34.790591/ | -34.790244/ |
|                                       | 0.0001      | 0.000091    | 0.000091    | 0.000089    | 0.00008     | 0.000083    | 0.000086    |
| CH <sub>4</sub> -I <sub>2</sub>       | -30.907227/ | -30.926036/ | -30.937568/ | -30.938035/ | -30.936613/ | -30.936581/ | -30.933286/ |
|                                       | 0.000085    | 0.000128    | 0.000082    | 0.000084    | 0.000079    | 0.000082    | 0.000103    |
| CH <sub>3</sub> F-CH <sub>3</sub> F   | -63.517265/ | -63.532594/ | -63.536251/ | -63.536469/ | 63.535492/  | -63.534647/ | -63.534068/ |
|                                       | 0.000116    | 0.000106    | 0.000114    | 0.000103    | 0.000109    | 0.000105    | 0.000108    |
| CH <sub>3</sub> Cl-CH <sub>3</sub> Cl | -44.900619/ | -44.91647/  | -44.919241/ | -44.920952/ | -44.920348/ | -44.919418/ | -44.919286/ |
|                                       | 0.000115    | 0.000117    | 0.000132    | 0.000112    | 0.000107    | 0.000116    | 0.000110    |
| CH <sub>3</sub> F-CH <sub>4</sub>     | -39.835052/ | -39.846974/ | -39.849135/ | -39.849324/ | -39.848662/ | -39.848488/ | -39.848083/ |
|                                       | 0.000096    | 0.000095    | 0.000093    | 0.000093    | 0.000091    | 0.000088    | 0.000083    |
| CH <sub>3</sub> Cl-CH <sub>4</sub>    | -30.518108  | -30.537797/ | -30.541565/ | -30.542149/ | -30.541488/ | -30.541323/ | -30.540927/ |
|                                       | 0.000099    | 0.000088    | 0.000094    | 0.000095    | 0.000091    | 0.000085    | 0.000084    |
| CHF <sub>3</sub> -CH <sub>4</sub>     | -87.263018/ | -87.271659/ | -87.273228/ | -87.273198/ | -87.273095/ | -87.272216/ | -87.271985/ |
|                                       | 0.000119    | 0.000115    | 0.000113    | 0.00012     | 0.000113    | 0.000115    | 0.000117    |
| CHCl <sub>3</sub> -CH <sub>4</sub>    | -59.272004/ | -59.289301/ | -59.294254/ | -59.294649/ | -59.294053/ | -59.292995/ | -59.293127/ |
|                                       | 0.000127    | 0.000132    | 0.000131    | 0.00012     | 0.000118    | 0.000127    | 0.000124    |

S9 Total energies and error bars of ten molecules at different inter-molecule distance

by DMC-DLA/aug-cc-pVTZ.(unit:a.u.)

| Molecules                             | 0.7         | 0.8         | 0.9         | 1.0         | 1.25        | 1.5         | 2.0         |
|---------------------------------------|-------------|-------------|-------------|-------------|-------------|-------------|-------------|
| CH <sub>4</sub> -F <sub>2</sub>       | -56.505747/ | -56.511537/ | -56.512528/ | -56.512799/ | -56.512524/ | -56.512348/ | -56.512163/ |
|                                       | 0.000108    | 0.000113    | 0.000114    | 0.000107    | 0.000111    | 0.000108    | 0.000111    |
| CH <sub>4</sub> -Cl <sub>2</sub>      | -37.937325/ | -37.955547/ | -37.959847/ | -37.959765/ | -37.959164/ | -37.958803/ | -37.958508/ |
|                                       | 0.000133    | 0.000138    | 0.000151    | 0.000134    | 0.000125    | 0.000122    | 0.000122    |
| CH <sub>4</sub> -Br <sub>2</sub>      | -34.782286/ | -34.804605/ | -34.810161/ | -34.810602/ | -34.80958/  | -34.809261/ | -34.808813/ |
|                                       | 0.000121    | 0.000092    | 0.000104    | 0.000098    | 0.000091    | 0.000095    | 0.000094    |
| CH <sub>4</sub> -I <sub>2</sub>       | -30.956228/ | -30.980719/ | -30.986794/ | -30.987536/ | -30.986213/ | -30.985855/ | -30.985421/ |
|                                       | 0.000105    | 0.000149    | 0.000092    | 0.000101    | 0.000091    | 0.00009     | 0.000124    |
| CH <sub>3</sub> F-CH <sub>3</sub> F   | -63.536298/ | -63.552032/ | -63.555375/ | -63.555413/ | -63.554408/ | -63.553851/ | -63.553472/ |
|                                       | 0.000131    | 0.000116    | 0.000117    | 0.000129    | 0.000123    | 0.00012     | 0.000124    |
| CH <sub>3</sub> Cl-CH <sub>3</sub> Cl | -44.851637/ | -44.867811/ | -44.871987/ | -44.872509/ | -44.871219/ | -44.870513/ | -44.870721/ |
|                                       | 0.000148    | 0.000149    | 0.000165    | 0.000147    | 0.000145    | 0.000157    | 0.000136    |
| CH <sub>3</sub> F-CH <sub>4</sub>     | -39.847794/ | -39.859398/ | -39.861654/ | -39.861561/ | -39.861054/ | -39.860613/ | -39.860668/ |
|                                       | 0.000104    | 0.000106    | 0.000108    | 0.000108    | 0.000097    | 0.000092    | 0.000094    |
| CH <sub>3</sub> Cl-CH <sub>4</sub>    | -30.496555/ | -30.51625/  | -30.520639/ | -30.520764/ | -30.519914/ | -30.519427/ | -30.519206/ |
|                                       | 0.000129    | 0.000117    | 0.000117    | 0.00012     | 0.000115    | 0.000112    | 0.000113    |
| CHF <sub>3</sub> -CH <sub>4</sub>     | -87.288564/ | -87.297475/ | -87.298558/ | -87.298743/ | -87.298271/ | -87.298064/ | -87.298155/ |
|                                       | 0.000138    | 0.00013     | 0.00013     | 0.00014     | 0.000129    | 0.000131    | 0.000132    |
| CHCl <sub>3</sub> -CH <sub>4</sub>    | -59.195642/ | -59.214178/ | -59.21848/  | -59.219301/ | -59.217845/ | -59.217585/ | -59.217397/ |
|                                       | 0.000182    | 0.000178    | 0.000177    | 0.000174    | 0.00016     | 0.000175    | 0.000177    |
